# Supplementary material for: Study design and protocol for a comprehensive evaluation of a UK massive open online course (MOOC) on quality improvement in healthcare
Source: PubMed Central journal article supplement — BMJ Open. 2019 Dec 23;9(12):e031973. doi: 10.1136/bmjopen-2019-031973 (PMC7008416; doi:10.1136/bmjopen-2019-031973), 2019-12-23
Supplement: bmjopen-2019-031973supp001.pdf [file bmjopen-2019-031973supp001.pdf]

Appendix 1: Study recruitment email  
Version 1.0, 26/03/2019  
QI MOOC Evaluation Study

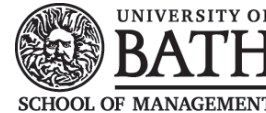

Dear Learner,

Thank you for your registering for the FutureLearn© MOOC, “Quality Improvement in Healthcare: the Case for Change.”

We would like to invite you to take part in a study to evaluate the impact of the Quality Improvement MOOC on your understanding and confidence to engage in QI activities.

We will be inviting all learners (enrolled on this course) to take part in the study. Participation in the study will involve completing 2 surveys, one before the MOOC, and one after the MOOC. There will also be the opportunity to take part in a follow-up interview around 3 months after the MOOC to see whether the MOOC has impacted on your confidence to engage in QI initiatives in your workplace/ organisation. With permission, the interviews will be recorded and transcribed verbatim, and take about 30-45 minutes.

Participation is completely voluntary, and if you want to stop you can simply leave this page at any time. All responses will be anonymous. Your responses on the study survey will not be associated with your FutureLearn© account, and will not impact your progress on the course or future courses.

If you are happy to proceed and for us to use your responses, please complete this first short survey before you take part in the MOOC (*insert link to electronic online consent form and pre-MOOC survey*). The survey should only take 10 or so minutes to complete, and will ask you some questions about yourself, your understanding of QI, and your confidence in participating in QI projects.

All the information collected will be stored and handled according to the University of Bath’s [code of good practice in research integrity](#) policy. The findings from the survey will be published in peer-reviewed journals and presented at conferences.

At the end of week 6, we will invite you to take part in the second survey and the 3-month follow-up interview.

If you have any questions, please email Dr Sian Smith-Lickess: [sk154@bath.ac.uk](mailto:sk154@bath.ac.uk)

Thank you very much,

Dr Sian Smith-Lickess & Professor Christos Vasilakis  
Bath Centre for Healthcare Innovation and Improvement (CHI<sup>2</sup>), School of Management,  
University of Bath, UK.

*Please note that this is an independent research carried out by the University of Bath and your participation is subject to the University’s own policies and terms. FutureLearn takes no responsibility for the contents or the consequences of your participation in this study. Your participation in the research has no effect on your course progress, marks or FutureLearn profile.*
