# Supplementary material for: Study design and protocol for a comprehensive evaluation of a UK massive open online course (MOOC) on quality improvement in healthcare
Source: PubMed Central journal article supplement — BMJ Open. 2019 Dec 23;9(12):e031973. doi: 10.1136/bmjopen-2019-031973 (PMC7008416; doi:10.1136/bmjopen-2019-031973), 2019-12-23
Supplement: bmjopen-2019-031973supp002.pdf [file bmjopen-2019-031973supp002.pdf]

Appendix 2: Participant information sheet  
Version 1.0, 26/03/2019,  
QI MOOC Evaluation Study

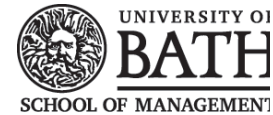

## Participant Information Sheet

---

### Quality Improvement in Healthcare MOOC Evaluation Study

We would like to invite you to take part in this study to help us to evaluate the Quality Improvement in Healthcare MOOC.

The research is being conducted by researchers at the Bath Centre for Healthcare Innovation and Improvement (CHI<sup>2</sup>), School of Management, University of Bath, UK.

We have prepared some information to help you decide whether you would like to take part in the study and tell you about what participation will involve.

This study was approved by the University of Bath Human Research Ethics Committee (reference: 2958).

#### 1. What is the purpose of the study?

This study aims to evaluate the effect of the Quality Improvement (QI) MOOC on building learner's knowledge, skills and confidence with engaging in QI activities after completing the course. The results from this study will also help us to understand how to improve the MOOC in future runs.

#### 2. What does participation involve?

Taking part in this study will involve completing some survey questions online before and after completing the course. These questions will ask you about your QI knowledge and confidence in participating in QI activities. We will also ask for your feedback on the course and suggestions on how we can improve it. This questionnaire will take about 15 minutes to complete.

We would also like to conduct individual follow-up interviews (by telephone or skype) with around 20 participants to explore how the course influenced their participation in QI activities and projects. The interviews will last about 30-45 minutes and take place about 3 months after the course has finished, at a convenient date and time. Consent for this interview will be sought separately. With participant consent, the interview will be recorded and transcribed verbatim.

#### 3. Do I have to take part in this study?

No. You do not have to take part in the study and can withdraw at any time without giving a reason. Withdrawing from the study will not affect your participation on the MOOC.

#### 4. How do I take part?

If you would like to take part in this study, you will be able to consent online when you register for the MOOC. Anyone who has registered to take part in the QI MOOC can take part in the study.

Appendix 2: Participant information sheet  
Version 1.0, 26/03/2019,  
QI MOOC Evaluation Study

### **5. What are the potential benefits of taking part?**

Taking part in this study will enable us to have a better understanding of how effective the MOOC is in relation to developing people's knowledge and skills in QI, and gives learners the confidence to participate in QI initiatives.

All participants will have the opportunity to be entered into a draw whereby 10 participants will be randomly chosen to receive a £20 amazon voucher.

### **6. What are the potential risks of taking part?**

The inconvenience of your time to complete the survey questions and potentially the follow-up telephone interview (if consented) that participation requires.

### **7. What will happen to information about me?**

To maintain confidentiality and anonymity, each participant will be given a unique identifier and data (survey, audio data and transcripts) will be securely stored in accordance with the University of Bath rules and regulations using password protected files.

All data will be kept strictly confidential and accessible only by University of Bath project administrators.

*Please note*: this is an independent research carried out by the University of Bath and your participation is subject to the University's own policies and terms. FutureLearn takes no responsibility for the contents or the consequences of your participation in this study. Your participation in the research has no effect on your course progress, marks or FutureLearn profile.

### **8. What will happen to the results?**

We plan to publish the results in peer-reviewed journals, and present them at conferences. Please contact Professor Christos Vasilakis or Dr Sian Smith-Lickess, if you have any questions about the study.

Bath Centre for Healthcare Innovation and Improvement (CHI<sup>2</sup>), School of Management, University of Bath, UK.

University of Bath | East Building | Claverton Down | BA2 7AY | UK  
Email: [sk154@bath.ac.uk](mailto:sk154@bath.ac.uk) | Tel: +44 (0) 7435 635 243
