# Supplementary material for: Study design and protocol for a comprehensive evaluation of a UK massive open online course (MOOC) on quality improvement in healthcare
Source: PubMed Central journal article supplement — BMJ Open. 2019 Dec 23;9(12):e031973. doi: 10.1136/bmjopen-2019-031973 (PMC7008416; doi:10.1136/bmjopen-2019-031973), 2019-12-23
Supplement: bmjopen-2019-031973supp003.pdf [file bmjopen-2019-031973supp003.pdf]

Appendix 3: Online consent form  
Version 1.0, 26/03/2019  
QI MOOC Evaluation Study

## Online Consent Form for Quality Improvement MOOC Evaluation study

---

You are invited to take part in a research study to evaluate the Quality Improvement (QI) in healthcare MOOC. This study will help us to understand if the course improves learners' knowledge and confidence to participate in QI projects, and identify ways in which we can improve the course. This study is being done by researchers from the Bath Centre for Healthcare Innovation and Improvement (CHI<sup>2</sup>), School of Management, University of Bath.

As part of this study, you are invited to participate in a web-based online survey to evaluate the MOOC course.

**ELECTRONIC CONSENT:** Please select your choice below. Clicking on the "Agree" button indicates that...

- You have read the participant information sheet for the above study.
- You understand the purpose of the research, and what you will be asked to do.
- You understand that participation is voluntary and you are free to withdraw, without giving a reason.
- You understand that your responses will remain anonymous.
- You understand that the results of this study may be published, and that publications will not contain my name or any identifiable information.
- You understand this is an independent research survey carried out by the Bath Centre for Healthcare Innovation and Improvement (CHI<sup>2</sup>), University of Bath, UK.
- Your participation in the study is subject to the University's own policies and terms.
- FutureLearn takes no responsibility for the contents or the consequences of your participation in this study. Your participation in the research has no effect on your course progress, marks or FutureLearn profile

- I agree to take part in the MOOC evaluation study  
 I do not agree to take part in the MOOC evaluation study
- 

### FOLLOW-UP INTERVIEW

We would also like to conduct a follow-up interview with around 20 participants (by telephone or Skype) about 3 months after the course has finished. This interview will explore in more detail how the course influenced participants' confidence and ability to engage in QI projects. If you would like to take part in this follow-up interview, please indicate below that you agreed to be contacted by one of the researchers.

- I agree to be contacted about the follow-up interview 3 months after the course

If you agree to take part, please let us know your preferred way to be contacted

- Email (please provide your email address \_\_\_\_\_)  
 Phone number – insert phone number \_\_\_\_\_

- I do not agree to be contacted about the follow-up interview
