# Supplementary material for: Study design and protocol for a comprehensive evaluation of a UK massive open online course (MOOC) on quality improvement in healthcare
Source: PubMed Central journal article supplement — BMJ Open. 2019 Dec 23;9(12):e031973. doi: 10.1136/bmjopen-2019-031973 (PMC7008416; doi:10.1136/bmjopen-2019-031973), 2019-12-23
Supplement: bmjopen-2019-031973supp005.pdf [file bmjopen-2019-031973supp005.pdf]

Appendix 5: Follow-up interview guide  
Version 1.0, 26/03/2019  
QI MOOC Evaluation Study

### Follow-up interview guide (3 months post-MOOC)

---

#### Aims

- Determine participant's perceived confidence to engage in QI activities, and design and implement projects
  - Identify what participants valued about the MOOC
  - Understand how the course impacted on behaviour and professional practice at work
  - Identify any potential QI projects that participants have taken part in, or have designed and implemented
  - Explore perceived barriers and facilitators to implementing QI projects
- 

- **Perceived value of course participation**

#### Probes

- Motivators – why did you do the course?
- Did you get what you wanted from the course?
- Have you done distance learning before?
- How useful was the course? Why?
- What steps could be taken to improve the course for next time?
- What did you gain most from taking part in the MOOC?

- **Collaborative learning**

#### Probes

- Can you tell me whether you interacted with other learners on the course, or the course team/educators? (e.g. through discussion posts)?
- How did you find interacting with other learners on the course?
- Was there a particular aspect that made you feel really engaged?
- Was there a particular activity or resource that stood out for you, that you remember now?

- **Perceived impact of the MOOC**

We are interested to know whether you have been able to apply the knowledge and skills to your work/professional practice.

- Have you been able to apply what you learnt from the course? Why/ why not?
- Intention or initiation of QI activities/ projects in your department- if not, why?
- Specific examples of these and how they have worked (or did not work in practice)

#### Probes:

- Please tell us a bit more about the specific project and its aims?
- What was the problem you were trying to solve/ improve?
- How was this achieved (or not)?
- Experience of involving colleagues and patients, other stakeholders
- Steps to do this – design, deliver, implement, sustain
- Steps to ensure improvements are sustained?

- **Barriers and facilitators to QI success**

We would like to know your thoughts on the potential barriers/ challenges and facilitators to improving quality in healthcare – the factors influencing QI success

- What do you see are the barriers / challenges to participating in QI initiatives in your organisation (engaging, designing, implementing QI projects)?
- Strategies to overcome barriers?
- What has helped you to be engaged in QI initiatives in your organisation?
- What are the factors that facilitate (or could facilitate) QI success in your professional practice?
